# Supplementary material for: Dietary quercetin intake is associated with lower ulcerative colitis risk but not Crohn's disease in a prospective cohort study and in vivo experiments
Source: Royal Society of Chemistry journal article supplement (doi:10.1039/d3fo05391a), 2024-01-01
Supplement: d3fo05391a1.pdf [file d3fo05391a1.pdf]

## Online supplementary material

Dietary quercetin intake can reduce ulcerative colitis risk but not Crohn's disease in a prospective cohort study

Lu et al.

### Menu

|                                                                                                                                    |    |
|------------------------------------------------------------------------------------------------------------------------------------|----|
| Supplementary Method for Animal Experiment.....                                                                                    | 2  |
| Supplementary Figure .....                                                                                                         | 5  |
| Figure S1 Cumulative incidence of incident IBD, CD, and UC in individuals according to daily quercetin intake in quintiles .....   | 5  |
| Supplementary Table .....                                                                                                          | 6  |
| Table S1 Definition of covariates .....                                                                                            | 6  |
| Table S2 Associations of dietary quercetin with IBD, CD, and UC in step-wise Cox models .....                                      | 10 |
| Table S3 Associations of dietary quercetin with risk of IBD, CD, and UC stratified by age and sex .....                            | 11 |
| Table S4 Associations of dietary quercetin with risk of IBD, CD, and UC stratified by smoking status and alcohol consumption ..... | 13 |
| Table S5 Associations of dietary quercetin with risk of IBD, CD, and UC stratified by BMI and physical activity.....               | 15 |
| Table S6 Sensitivity analysis for associations of dietary quercetin with risk of IBD, CD, and UC .....                             | 17 |
| Table S7 Mediation analysis for C-reactive protein in associations of dietary quercetin with risk of IBD and UC .....              | 20 |

## **Supplementary Method for Animal Experiment**

### **Mice, Reagents, and Colitis Model**

Specific pathogen-free (SPF) C57BL/6 mice were purchased from and raised in Shanghai Model Organisms Center, Co., Ltd. (Shanghai, China). All animals were randomly grouped and hosted in laminar flow cabinets under conditions at 22°C under a 12 h light/12 h dark cycle with ad libitum access to water and chow. A total of 40 male C57BL/6 at 5 weeks of age were kept in the SPF environment for adaptive growth for one week for further treatment. And 37 mice were analyzed finally with three dying because of chemical induction.

Dextran Sulfate Sodium Salt (DSS, MPbio 216011090, Mw 36000-50000Da) was bought from MP Biomedicals, and diluted in ddH<sub>2</sub>O at a concentration of 3%. Trinitro-benzene-sulfonic acid (TNBS, MB5523-1) was bought from MeilunBio, Co., Ltd. (Dalian, China), and dissolved in double distilled water (ddH<sub>2</sub>O) and diluted with different solvents for different intentions. Quercetin (SQ8030; CAS number 117-39-5) was bought from Beijing Solarbio Science & Technology Co., Ltd.(Beijing, China), and dissolved in 2%-Tween80(Sigma, P4780)-containing ddH<sub>2</sub>O in a concentration of 3mg/mL.

Mice at 6 weeks of age were used to conduct experiments after one week of adaptive growth. We set groups as follows: (1) DSS model. For the control (Ctrl.) group, 2%-Tween80 (Sigma, P4780)-containing ddH<sub>2</sub>O was given in the pretreatment stage and ddH<sub>2</sub>O was given in the induction stage. For DSS group, 2%-Tween80(Sigma, P4780)-containing ddH<sub>2</sub>O was given in the pretreatment stage and 3% DSS solution was given for 7 days later, renewed every 2 to 3 days. For DSS+quercetin group, mice were pretreated with 100 µl of quercetin solution (at an amount of 15mg/kg, orally) daily for 14 days, and given DSS solution later. All mice were sacrificed 3 days later for the next examinations. (2) TNBS model. For the control (Ctrl.) group, 2%-Tween90-containing ddH<sub>2</sub>O was given in gavage in the pretreatment stage and the 4:1 Acetone/olive oil mixture was applied to the skin in the presensitization stage. For TNBS group, 2%-Tween90-containing ddH<sub>2</sub>O was given in gavage in the pretreatment stage and 150 µl of 1.0% (wt/vol) TNBS solution was applied to the skin, and 8 days after presensitization 100 µl of 2.5% (wt/vol) TNBS solution was injected into the mice colon to established TNBS-induce colitis model. For TNBS+quercetin group, mice were pretreated with 100 µl of quercetin solution (at an amount of 15mg/kg, orally) daily for 14 days, followed by TNBS induction. All mice were sacrificed 5 days later or next examinations.

### **Measurement of Disease Activity Index (DAI)**

Body weight was measured and recorded from the first day of induction, and stools were collected the day before sacrifice. Fecal occult blood was tested according to the manual of fecal occult blood test kit (C027-1-1, Nanjing Jiancheng Bioengineering Institute). The mice were scored using the DAI according to the international criteria [1], and the formula was: (weight loss score + stool shape score + stool blood score)/3.

### Histopathological Score Measurement, PAS-AB Stain, and Immunohistochemistry Analysis

Formaldehyde-fixed colon tissue was embedded in paraffin and sliced. For histopathological score measurement, the slices were dewaxed in xylene and gradient ethanol, then they were stained with hematoxylin and eosin successively, and the histopathological score was based on the Geboes criteria [2], and each group of slices was assessed by 2 observers who were blinded to the grouping of the mice. For the PAS-AB stain, dewaxed slices were sequentially stained with alcian blue, periodic acid, and Schiff reagent. For immunohistochemistry analysis of Claudin-1 expression, prepared slices were treated with 3% H<sub>2</sub>O<sub>2</sub> to reduce endogenous background, then repaired in citrate solution, blocked the nonspecific antigenic epitopes by sheep serum, incubated under 4°C overnight with Claudin-1 antibody (Servicebio, GB12032, dilution 1:500). Next day, the slices were incubated with secondary antibody and the color developing of DAB substrate system was finished under light microscope with the same developing time.

### RNA extraction and quantified Real-time PCR

Mice colonic tissues were frozen and total RNA was extracted with TRIzol reagent (Invitrogen, USA), and reverse transcribed using the PrimeScript RT Reagent Kit (Takara, Japan). Relative mRNA expression was calculated using the  $-\Delta\Delta C_t$  method based on the  $C_t$  values obtained from StepOnePlus real-time PCR system (Applied Biosystems, FosterCity, California), referring to colitis group. The primers were synthesized by Tsingke Biotechnology Co., Ltd, and the sequences were listed in the following Table.

| Primer sequences for qRT-PCR ( <i>Mus musculus</i> ) |                           |                           |
|------------------------------------------------------|---------------------------|---------------------------|
| Name                                                 | Sense (5'-3')             | Antisense (5'-3')         |
| <i>Actb</i>                                          | CATTGCTGACAGGATGCAGAAGG   | TGCTGGAAGGTGGACAGTGAGG    |
| <i>S100a8</i>                                        | TGCCCTCTACAAGAATGACTTCAAG | TTATCACCATCGCAAGGAACTCC   |
| <i>S100a9</i>                                        | ATCTCCGTTCTTCAGTGTAGCAATG | ATCAGCATCATACTCCTCAAAGC   |
| <i>Lcn2</i>                                          | ACCACGGACTACAACCAAGTTCG   | ACTTGGCAAAGCGGGTGAAAC     |
| <i>Cxcl9</i>                                         | CCAGCCGAGGCACGATCC        | ATCTCCGTTCTTCAGTGTAGCAATG |

The primer sequences for the above-mentioned genes were from the Tsingke (China).

### Statistical analysis

Data were presented as the means  $\pm$  SEM. Error bars in data represent SEM. OneSample Kolmogorov-Smirnov test was first utilized to evaluate whether data was normally distributed. For normally distributed data, independent student t-test was used for comparisons between two groups, and one-way ANOVA test was applied for comparisons among three groups. For skewed distributed data, nonparametric Mann-Whitney test was performed for data between two groups, and nonparametric Kruskal-Wallis test was utilized for comparisons within three groups. Statistical tests were two-tailed, adjusted using the Benjamini-Hochberg (BH) method, and a value of  $P < 0.05$  was considered statistically

significant (\*  $P < 0.05$ , \*\*  $P < 0.011$ , \*\*\*  $P < 0.001$ , \*\*\*\* $P < 0.0001$ ). For animal experiments,  $n \geq 5$  biological samples for DSS model and  $n \geq 6$  or TNBS. The sample size used for each experiment was marked in figures.

### **Reference**

- [1] Cooper HS, Murthy SN, Shah RS, Sedergran DJ. Clinicopathologic study of dextran sulfate sodium experimental murine colitis. *Lab Invest.* Aug 1993;69(2):238-49.
- [2] Jauregui-Amezaga A, Geerits A, Das Y, et al. A Simplified Geboes Score for Ulcerative Colitis. *Journal of Crohn's and Colitis.* 2016;11(3):305-313. doi:10.1093/ecco-jcc/jjw154

### Supplementary Figure

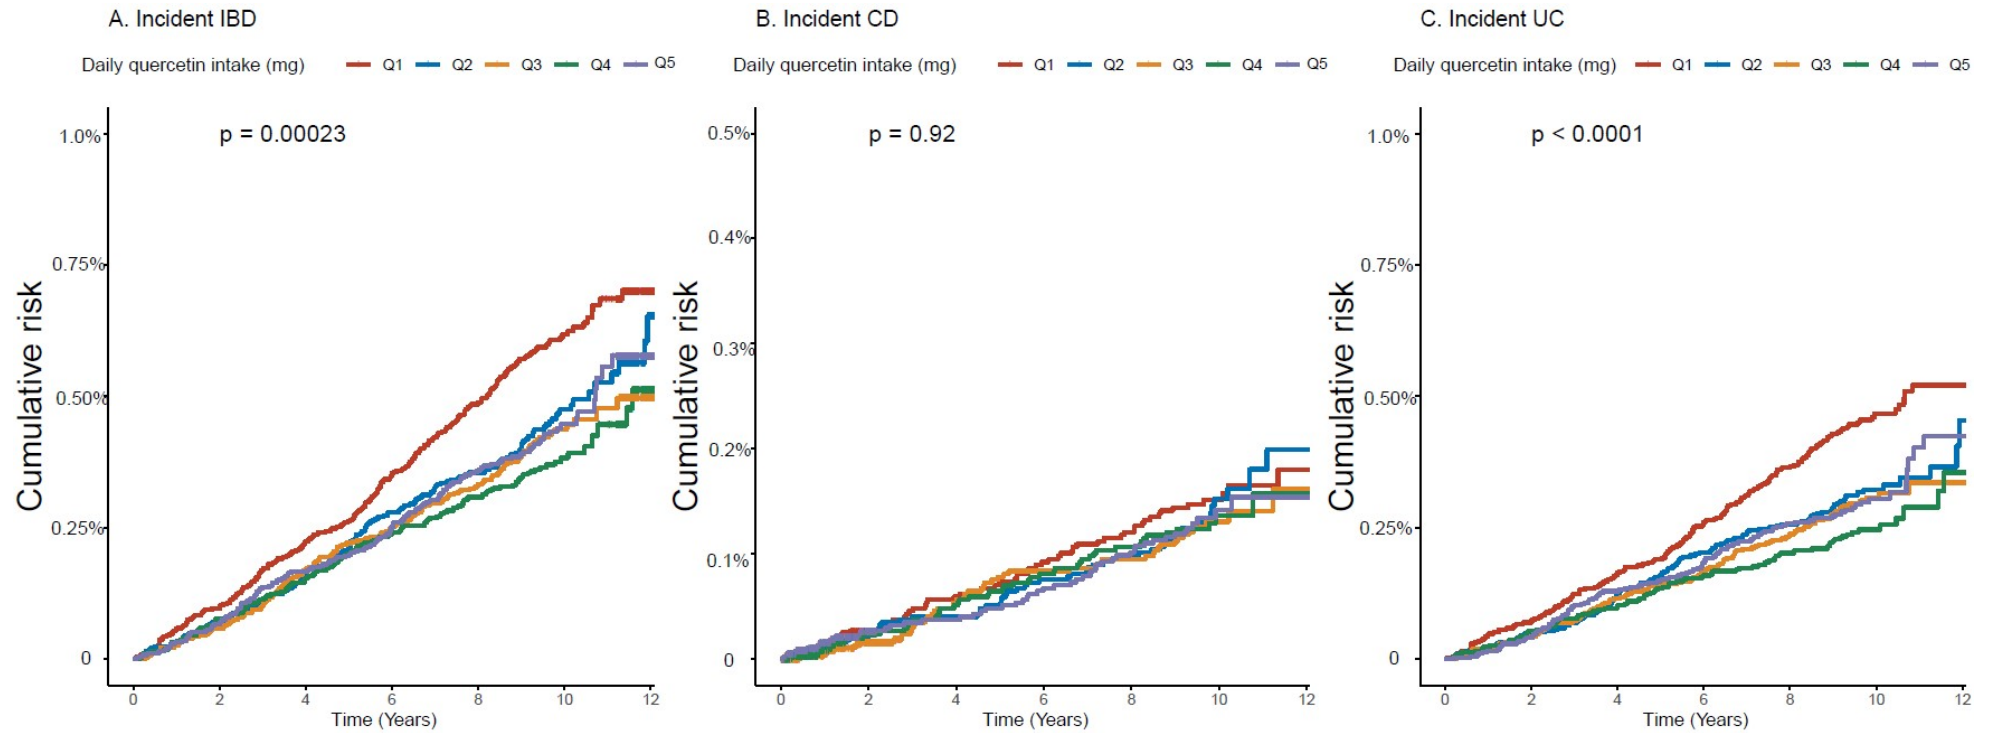

**Figure S1 Cumulative incidence of incident IBD, CD, and UC in individuals according to daily quercetin intake in quintiles. CD, Crohn's disease; IBD, inflammatory**

bowel disease; UC, ulcerative colitis

**Supplementary Table**

**Table S1 Definition of covariates**

|                                  | <b>UK Biobank</b>                                                                                                                                                                                                                                                                                                                                                                                                                                                                                                                                                        |
|----------------------------------|--------------------------------------------------------------------------------------------------------------------------------------------------------------------------------------------------------------------------------------------------------------------------------------------------------------------------------------------------------------------------------------------------------------------------------------------------------------------------------------------------------------------------------------------------------------------------|
| Age at recruitment               | This is a derived variable based on date of birth and date of attending an initial assessment centre and refers to the age of the participant on the day they attended an Initial Assessment Centre, truncated to whole year.<br><br>(response: as continues variable)                                                                                                                                                                                                                                                                                                   |
| Sex                              | A mixture of the sex the National Health Service had recorded for the participant and self-reported sex<br><br>(response: categorical variable “ <b>Female</b> ”, “ <b>Male</b> ”)                                                                                                                                                                                                                                                                                                                                                                                       |
| Ethnicity                        | Self-reported: “What is your ethnic background”. We classified the responses into: <b>White</b> (White) and <b>Others</b> (Mixed, Asian or Asian British, Black or Black British, Chinese, and other ethnic group)                                                                                                                                                                                                                                                                                                                                                       |
| Education                        | Self-reported: “Which of the following qualifications do you have” We classified the responses into: <b>College</b> (College or University degree) and <b>Below college</b> (A levels/AS levels or equivalent, O levels/GCSEs or equivalent, CSEs or equivalent, NVQ or HND or HNC or equivalent, other professional qualifications eg: nursing, teaching, and none of the above)                                                                                                                                                                                        |
| Townsend deprivation index (TDI) | The higher, the more socioeconomic deprivation one was suffering. TDI was derived according to the unemployment rate, the percentage of overcrowded households, the percentage of people without cars, and the percentage of people without houses for each area in the UK, and baseline TDI calculated immediately before participant joining UK Biobank based on the preceding national census output areas. Each participant was assigned a score corresponding to the output area in which their postcode is located (ref).<br><br>(response: as continues variable) |
| Smoking status                   | Self-reported current/past smoking status of the participant. We classified the                                                                                                                                                                                                                                                                                                                                                                                                                                                                                          |

|                                                  |                                                                                                                                                                                                                                                                                                                                                                                                                  |
|--------------------------------------------------|------------------------------------------------------------------------------------------------------------------------------------------------------------------------------------------------------------------------------------------------------------------------------------------------------------------------------------------------------------------------------------------------------------------|
|                                                  | <b>UK Biobank</b>                                                                                                                                                                                                                                                                                                                                                                                                |
|                                                  | responses into: <b>Never smoked</b> (Never) and <b>Former or current smoker</b> (Previous, current)                                                                                                                                                                                                                                                                                                              |
| Physical activity                                | Self-reported: UK Biobank physical activity questionnaire. We classified the responses into <b>Adequate</b> (150 minutes moderate activity per week OR $\geq 75$ minutes vigorous activity per week OR equivalent combination OR moderate physical activity at least 5 days a week or vigorous activity once a week) and <b>Inadequate</b> (below adequate level) recommended by the American Heart Association. |
| Body mass index (BMI)                            | BMI value is constructed from height and weight measured during the initial assessment centre visit. Relevant variable was measured by trained staff.<br><br>(response: as continues variable)                                                                                                                                                                                                                   |
| Modified Alternative Healthy Eating Index (AHEI) | The modified AHEI included five items, including red meat, processed meat, fruit, vegetables and fat. Each dietary item scored 0 (unhealthiest), 5 and 10 (healthiest), respectively.<br><br>(response: as continues variable)                                                                                                                                                                                   |
| Total energy                                     | Total energy from overall diet estimating from the mean intake of the 24h WebQ                                                                                                                                                                                                                                                                                                                                   |
| Nutrients intake                                 | Including protein, fat, carbohydrate, sugar, vitamin D, vitamin E, vitamin B12, folate, zinc, and dietary fiber estimating from the mean intake of the 24h WebQ                                                                                                                                                                                                                                                  |
| Charlson Comorbidity Index (CCI)                 | CCI is a highly cited and well-established tool for measuring comorbidity in clinical research. We calculated CCI as a variable reflecting objective health status. Mak JKL et al developed the calculation of CCI in the UK Biobank, which were constructed based on 17 comorbidities with assigned weights associated with ICD codes from hospital records.<br><br>(as continues variable range from 0 to 16)  |

|                                       | <b>UK Biobank</b>                                                                                                                                                                                                                                                                                                                                                                                                                                                                                                                                                                                                                                                                     |
|---------------------------------------|---------------------------------------------------------------------------------------------------------------------------------------------------------------------------------------------------------------------------------------------------------------------------------------------------------------------------------------------------------------------------------------------------------------------------------------------------------------------------------------------------------------------------------------------------------------------------------------------------------------------------------------------------------------------------------------|
| Non-steroidal anti-inflammatory drugs | We used the self-reported answer to “Do you regularly take any of the following?” We classified the usage of non-steroidal anti-inflammatory drugs into: Yes (Who chose option “aspirin”, “Ibuprofen”, or “Paracetamol”) and No (other choices). selection allowed for the usual names of the corresponding drugs will be verified in the verbal interview.                                                                                                                                                                                                                                                                                                                           |
| Proton pump inhibitors                | We used the data from verbal interview by trained nurse on prescription medications. Data on any regular treatments taken weekly, monthly, etc. It does not include short-term medications (such as a 1 week course of antibiotics) or prescribed medication that is not taken, or over-the-counter medications). For proton pump inhibitors, we classified the usage of proton pump inhibitors into: Yes (Who reported Lansoprazole, omeprazole, pantoprazole, esomeprazole, and rabeprazole) and No (other medicine) based on the previous study                                                                                                                                    |
| Antibiotics                           | We used the data from verbal interview by trained nurse on prescription medications. Data on any regular treatments taken weekly, monthly, etc. It does not include short-term medications (such as a 1 week course of antibiotics) or prescribed medication that is not taken, or over-the-counter medications). For proton pump inhibitors, we classified the usage of proton pump inhibitors into: Yes (Tetracyclines, Beta-lactam antibacterials and penicillins, xulfonamides and trimethoprim, macrolides, lincosamides, and streptogramins, aminoglycoside antibacterials, quinolone antibacterials, other antibacterials) and No (other medicine) based on the previous study |
| C-reactive protein                    | Assessed using immuno-turbidimetric method with platform (Beckman Coulter AU5800).                                                                                                                                                                                                                                                                                                                                                                                                                                                                                                                                                                                                    |
| Oral contraceptive pills              | We used the self-reported answer to “Have you ever taken the oral contraceptive pill? (include the 'mini-pill')” We classified the usage of oral contraceptive pills into: Yes (Who chose option “Yes”) and No (other                                                                                                                                                                                                                                                                                                                                                                                                                                                                 |



|  |                   |
|--|-------------------|
|  | <b>UK Biobank</b> |
|  | choices).         |

**Table S2 Associations of dietary quercetin with IBD, CD, and UC in step-wise Cox models**

| Quercetin intake (mg/d)           | Model 2 <sup>a</sup>                  | Model 3 <sup>b</sup>     |
|-----------------------------------|---------------------------------------|--------------------------|
|                                   | HR (95% CI)                           | HR (95% CI)              |
| <b>Inflammatory bowel disease</b> |                                       |                          |
| Q1 (0-<8.9)                       | Ref                                   | Ref                      |
| Q2 (8.9-<15.0)                    | <b>0.80 (0.66, 0.98) <sup>c</sup></b> | <b>0.79 (0.65, 0.97)</b> |
| Q3 (15.0-<21.6)                   | <b>0.74 (0.60, 0.91)</b>              | <b>0.73 (0.59, 0.90)</b> |
| Q4 (21.6-<31.9)                   | <b>0.66 (0.54, 0.82)</b>              | <b>0.65 (0.52, 0.80)</b> |
| Q5 (≥31.9)                        | <b>0.78 (0.63, 0.96)</b>              | <b>0.75 (0.61, 0.93)</b> |
| P-trend                           | <b>0.003</b>                          | <b>0.001</b>             |
| <b>Crohn's disease</b>            |                                       |                          |
| Q1 (0-<8.9)                       | Ref                                   | Ref                      |
| Q2 (8.9-<15.0)                    | 0.95 (0.66, 1.39)                     | 0.95 (0.65, 1.38)        |
| Q3 (15.0-<21.6)                   | 0.87 (0.59, 1.28)                     | 0.86 (0.58, 1.27)        |
| Q4 (21.6-<31.9)                   | 0.88 (0.59, 1.30)                     | 0.86 (0.58, 1.28)        |
| Q5 (≥31.9)                        | 0.91 (0.62, 1.35)                     | 0.88 (0.59, 1.32)        |
| P-trend                           | 0.542                                 | 0.455                    |
| <b>Ulcerative colitis</b>         |                                       |                          |
| Q1 (0-<8.9)                       | Ref                                   | Ref                      |
| Q2 (8.9-<15.0)                    | <b>0.75 (0.59, 0.95)</b>              | <b>0.74 (0.59, 0.94)</b> |
| Q3 (15.0-<21.6)                   | <b>0.70 (0.55, 0.89)</b>              | <b>0.68 (0.54, 0.87)</b> |
| Q4 (21.6-<31.9)                   | <b>0.59 (0.46, 0.76)</b>              | <b>0.57 (0.44, 0.75)</b> |
| Q5 (≥31.9)                        | <b>0.73 (0.57, 0.94)</b>              | <b>0.71 (0.55, 0.91)</b> |
| P-trend                           | <b>0.002</b>                          | <b>0.001</b>             |

BMI, body mass index; CD, Crohn's disease; CI, confidence interval; HR, hazard ratio; IBD, inflammatory bowel disease; Ref, reference group; TDI, Townsend deprivation index; UC, ulcerative colitis

<sup>a</sup> adjusted for age, sex, ethnic background, physical activity, BMI, TDI, smoking status, alcoholic drinks consumption (exclude wine)

<sup>b</sup> adjusted for age, sex, ethnic background, physical activity, BMI, TDI, smoking status, alcoholic drinks consumption (exclude wine), and total energy

<sup>c</sup> represent P value<0.05

**Table S3 Associations of dietary quercetin with risk of IBD, CD, and UC stratified by age and sex <sup>a</sup>**

| Quercetin intake | Age               |                                       |                   |                   | Sex <sup>b</sup>  |                          |                   |                          |
|------------------|-------------------|---------------------------------------|-------------------|-------------------|-------------------|--------------------------|-------------------|--------------------------|
|                  | <60               |                                       | ≥60               |                   | Female            |                          | Male              |                          |
|                  | Case/person-years | HR (95% CI)                           | Case/person-years | HR (95% CI)       | Case/person-years | HR (95% CI)              | Case/person-years | HR (95% CI)              |
| <b>IBD</b>       |                   |                                       |                   |                   |                   |                          |                   |                          |
| Q1               | 112/214,161       | Ref                                   | 115/151,858       | Ref               | 94/168,216        | Ref                      | 133/197,803       | Ref                      |
| Q2               | 91/176,293        | 1.02 (0.77, 1.36)                     | 83/182,292        | 0.63 (0.47, 0.83) | 87/186,952        | 0.85 (0.63, 1.15)        | 87/171,633        | <b>0.74 (0.56, 0.98)</b> |
| Q3               | 60/164,536        | 0.72 (0.52, 1.01)                     | 99/193,746        | 0.71 (0.54, 0.95) | 79/197,299        | 0.74 (0.54, 1.01)        | 80/160,983        | <b>0.72 (0.53, 0.96)</b> |
| Q4               | 50/156,029        | <b>0.63 (0.44, 0.91) <sup>c</sup></b> | 91/201,507        | 0.64 (0.47, 0.87) | 79/211,816        | <b>0.69 (0.49, 0.96)</b> | 62/145,720        | <b>0.60 (0.43, 0.84)</b> |
| Q5               | 70/152,888        | 0.88 (0.62, 1.25)                     | 92/203,793        | 0.63 (0.46, 0.88) | 87/228,518        | <b>0.69 (0.49, 0.97)</b> | 75/128,163        | 0.81 (0.58, 1.13)        |
| P-trend          |                   | 0.082                                 |                   | <b>0.021</b>      |                   | <b>0.02</b>              |                   | 0.078                    |
| P-interaction    |                   |                                       | □                 | 0.058             | □                 | □                        | □                 | 0.562                    |
| <b>CD</b>        |                   |                                       |                   |                   |                   |                          |                   |                          |
| Q1               | 30/216,352        | Ref                                   | 28/153,827        | Ref               | 21/170,122        | Ref                      | 37/200,058        | Ref                      |
| Q2               | 24/178,684        | 1.14 (0.65, 1.99)                     | 29/185,114        | 0.91 (0.54, 1.55) | 31/189,650        | 1.45 (0.82, 2.56)        | 22/174,148        | 0.73 (0.42, 1.25)        |
| Q3               | 20/166,714        | 1.08 (0.59, 1.98)                     | 28/196,874        | 0.85 (0.49, 1.48) | 22/200,281        | 1.02 (0.54, 1.91)        | 26/163,306        | 0.93 (0.54, 1.60)        |
| Q4               | 18/158,071        | 1.09 (0.57, 2.08)                     | 30/204,777        | 0.90 (0.51, 1.59) | 27/215,057        | 1.22 (0.65, 2.27)        | 21/147,791        | 0.84 (0.46, 1.54)        |

|               |            |                              |            |                              |            |                              |            |                              |
|---------------|------------|------------------------------|------------|------------------------------|------------|------------------------------|------------|------------------------------|
| Q5            | 23/155,011 | 1.43 (0.76,<br>2.71)         | 26/207,082 | 0.73 (0.39,<br>1.35)         | 27/232,049 | 1.10 (0.57,<br>2.09)         | 22/130,044 | 0.99 (0.53,<br>1.85)         |
| P-trend       |            | 0.367                        |            | 0.369                        |            | 0.899                        |            | 0.926                        |
| P-interaction |            |                              | □          | 0.827                        | □          | □                            | □          | 0.401                        |
| UC            |            |                              |            |                              |            |                              |            |                              |
| Q1            | 82/216,138 | Ref                          | 87/153,530 | Ref                          | 73/169,824 | Ref                          | 96/199,844 | Ref                          |
| Q2            | 67/178,468 | 0.98 (0.70,<br>1.37)         | 54/184,994 | <b>0.54 (0.38,<br/>0.76)</b> | 56/189,530 | <b>0.69 (0.48,<br/>0.99)</b> | 65/173,932 | 0.75 (0.54,<br>1.04)         |
| Q3            | 40/166,607 | <b>0.61 (0.41,<br/>0.92)</b> | 71/196,715 | <b>0.68 (0.48,<br/>0.94)</b> | 57/200,172 | <b>0.66 (0.46,<br/>0.96)</b> | 54/163,149 | <b>0.65 (0.46,<br/>0.93)</b> |
| Q4            | 32/158,013 | <b>0.50 (0.32,<br/>0.79)</b> | 61/204,614 | <b>0.57 (0.39,<br/>0.81)</b> | 52/214,911 | <b>0.56 (0.37,<br/>0.83)</b> | 41/147,716 | <b>0.53 (0.36,<br/>0.80)</b> |
| Q5            | 47/154,890 | 0.72 (0.47,<br>1.10)         | 66/206,874 | <b>0.61 (0.42,<br/>0.89)</b> | 60/231,870 | <b>0.59 (0.39,<br/>0.88)</b> | 53/129,895 | 0.76 (0.51,<br>1.12)         |
| P-trend       |            | <b>0.009</b>                 |            | <b>0.033</b>                 |            | <b>0.009</b>                 |            | <b>0.039</b>                 |
| P-interaction |            |                              | □          | <b>0.039</b>                 | □          | □                            | □          | 0.667                        |

CD, Crohn's disease; CI, confidence interval; HR, hazard ratio; IBD, inflammatory bowel disease; Ref, reference group; UC, ulcerative colitis

<sup>a</sup> Based on the fully adjusted model without adjustment for corresponding items

<sup>b</sup> additionally adjusted for oral contraceptive pills in females

<sup>c</sup> represent P value < 0.05

**Table S4 Associations of dietary quercetin with risk of IBD, CD, and UC stratified by smoking status and alcohol consumption <sup>a</sup>**

| Quercetin intake | Smoking           |                                      |                     |                          | Alcohol consumption |                          |                   |                          |                   |                          |
|------------------|-------------------|--------------------------------------|---------------------|--------------------------|---------------------|--------------------------|-------------------|--------------------------|-------------------|--------------------------|
|                  | Never             |                                      | Previous or current |                          | None                |                          | Moderate          |                          | Heavy             |                          |
|                  | Case/person-years | HR (95% CI)                          | Case/person-years   | HR (95% CI)              | Case/person-years   | HR (95% CI)              | Case/person-years | HR (95% CI)              | Case/person-years | HR (95% CI)              |
| <b>IBD</b>       |                   |                                      |                     |                          |                     |                          |                   |                          |                   |                          |
| Q1               | 133/197,803       | Ref                                  | 130/170,224         | Ref                      | 97/158,976          | Ref                      | 77/129,896        | Ref                      | 53/77,147         | Ref                      |
| Q2               | 87/171,633        | 0.87 (0.65, 1.17)                    | 83/155,161          | <b>0.73 (0.55, 0.97)</b> | 72/118,234          | 1.04 (0.76, 1.43)        | 60/152,841        | <b>0.65 (0.46, 0.92)</b> | 42/87,510         | 0.73 (0.48, 1.11)        |
| Q3               | 80/160,983        | <b>0.69 (0.50, 0.96)<sup>b</sup></b> | 84/151,885          | 0.77 (0.58, 1.04)        | 51/107,276          | 0.82 (0.57, 1.17)        | 66/156,169        | <b>0.68 (0.48, 0.97)</b> | 42/94,837         | 0.70 (0.45, 1.08)        |
| Q4               | 62/145,720        | <b>0.65 (0.46, 0.91)</b>             | 68/150,510          | <b>0.65 (0.47, 0.90)</b> | 36/101,526          | <b>0.61 (0.40, 0.92)</b> | 72/159,012        | 0.73 (0.51, 1.05)        | 33/96,998         | <b>0.56 (0.34, 0.91)</b> |
| Q5               | 75/128,163        | <b>0.65 (0.46, 0.93)</b>             | 82/141,120          | 0.83 (0.60, 1.15)        | 64/120,682          | 0.90 (0.62, 1.30)        | 66/161,271        | <b>0.63 (0.43, 0.93)</b> | 32/74,728         | 0.73 (0.43, 1.23)        |
| P-trend          |                   | <b>0.006</b>                         |                     | 0.179                    |                     | 0.144                    |                   | 0.09                     |                   | 0.102                    |
| P-interaction    |                   | □                                    | □                   | 0.629                    |                     | □ □                      | □                 | □                        | □                 | 0.304                    |
| <b>CD</b>        |                   |                                      |                     |                          |                     |                          |                   |                          |                   |                          |
| Q1               | 37/200,058        | Ref                                  | 39/172,157          | Ref                      | 28/160,400          | Ref                      | 16/131,746        | Ref                      | 14/78,034         | Ref                      |
| Q2               | 22/174,148        | <b>1.85 (1.04, 3.31)</b>             | 17/157,458          | <b>0.57 (0.32, 1.03)</b> | 21/119,645          | 1.23 (0.68, 2.23)        | 21/155,404        | 1.10 (0.56, 2.14)        | 11/88,749         | 0.73 (0.32, 1.64)        |
| Q3               | 26/163,306        | 1.26 (0.67, 2.38)                    | 23/154,159          | 0.87 (0.50, 1.51)        | 16/108,476          | 1.10 (0.57, 2.11)        | 20/158,884        | 1.01 (0.50, 2.02)        | 12/96,228         | 0.75 (0.33, 1.71)        |
| Q4               | 21/147,791        | 1.39 (0.72, 2.65)                    | 20/152,740          | 0.83 (0.45, 1.52)        | 13/102,683          | 1.01 (0.49, 2.07)        | 25/161,804        | 1.24 (0.61, 2.51)        | 10/98,360         | 0.63 (0.26, 1.57)        |

|               |            |                          |            |                          |            |                          |            |                          |           |                          |
|---------------|------------|--------------------------|------------|--------------------------|------------|--------------------------|------------|--------------------------|-----------|--------------------------|
| Q5            | 22/130,044 | 1.22 (0.62, 2.41)        | 22/143,299 | 0.98 (0.53, 1.80)        | 25/122,076 | 1.67 (0.89, 3.13)        | 16/164,196 | 0.73 (0.33, 1.62)        | 8/75,821  | 0.68 (0.24, 1.90)        |
| P-trend       |            | 0.846                    |            | 0.821                    |            | 0.215                    |            | 0.556                    |           | 0.416                    |
| P-interaction |            | □                        | □          | <b>0.013</b>             |            | □ □                      | □          | □                        | □         | 0.642                    |
| <b>UC</b>     |            |                          |            |                          |            |                          |            |                          |           |                          |
| Q1            | 96/199,844 | Ref                      | 91/171,916 | Ref                      | 69/160,175 | Ref                      | 61/131,534 | Ref                      | 39/77,958 | Ref                      |
| Q2            | 65/173,932 | <b>0.65 (0.45, 0.93)</b> | 66/157,222 | 0.79 (0.57, 1.09)        | 51/119,474 | 0.97 (0.66, 1.41)        | 39/155,320 | <b>0.54 (0.35, 0.81)</b> | 31/88,668 | 0.74 (0.45, 1.20)        |
| Q3            | 54/163,149 | <b>0.57 (0.39, 0.83)</b> | 61/153,989 | 0.75 (0.53, 1.06)        | 35/108,389 | 0.72 (0.47, 1.11)        | 46/158,785 | <b>0.61 (0.40, 0.91)</b> | 30/96,147 | 0.69 (0.41, 1.14)        |
| Q4            | 41/147,716 | <b>0.49 (0.32, 0.74)</b> | 48/152,613 | <b>0.60 (0.41, 0.89)</b> | 23/102,656 | <b>0.48 (0.29, 0.81)</b> | 47/161,677 | <b>0.60 (0.39, 0.93)</b> | 23/98,295 | <b>0.54 (0.30, 0.95)</b> |
| Q5            | 53/129,895 | <b>0.53 (0.35, 0.80)</b> | 60/143,084 | 0.79 (0.54, 1.16)        | 39/122,010 | 0.66 (0.42, 1.05)        | 50/164,026 | <b>0.61 (0.39, 0.96)</b> | 24/75,728 | 0.75 (0.41, 1.38)        |
| P-trend       |            | <b>0.002</b>             |            | 0.096                    |            | <b>0.01</b>              |            | 0.113                    |           | 0.164                    |
| P-interaction |            | □                        | □          | 0.803                    |            | □ □                      | □          | □                        | □         | 0.46                     |

CD, Crohn's disease; CI, confidence interval; HR, hazard ratio; IBD, inflammatory bowel disease; Ref, reference group; UC, ulcerative colitis

<sup>a</sup> Based on the fully adjusted model without adjustment for corresponding items

<sup>b</sup> represent P value<0.05

**Table S5 Associations of dietary quercetin with risk of IBD, CD, and UC stratified by BMI and physical activity <sup>a</sup>**

| Quercetin intake | BMI                   |                                       |                       |                   | Physical activity |                   |                   |                          |
|------------------|-----------------------|---------------------------------------|-----------------------|-------------------|-------------------|-------------------|-------------------|--------------------------|
|                  | <30 Kg/m <sup>2</sup> |                                       | ≥30 Kg/m <sup>2</sup> |                   | Inadequate        |                   | Adequate          |                          |
|                  | Case/person-years     | HR (95% CI)                           | Case/person-years     | HR (95% CI)       | Case/person-years | HR (95% CI)       | Case/person-years | HR (95% CI)              |
| <b>IBD</b>       |                       |                                       |                       |                   |                   |                   |                   |                          |
| Q1               | 159/263,111           | Ref                                   | 68/102,908            | Ref               | 82/127,380        | Ref               | 145/238,639       | Ref                      |
| Q2               | 133/278,272           | 0.80 (0.63, 1.02)                     | 41/80,313             | 0.76 (0.51, 1.13) | 60/108,750        | 0.89 (0.63, 1.26) | 114/249,835       | <b>0.75 (0.58, 0.96)</b> |
| Q3               | 109/289,293           | <b>0.64 (0.49, 0.83) <sup>b</sup></b> | 50/68,989             | 1.07 (0.73, 1.59) | 47/98,446         | 0.78 (0.53, 1.14) | 112/259,836       | <b>0.70 (0.54, 0.91)</b> |
| Q4               | 116/295,639           | <b>0.66 (0.51, 0.87)</b>              | 25/61,897             | 0.59 (0.36, 0.98) | 41/88,815         | 0.75 (0.50, 1.15) | 100/268,721       | <b>0.61 (0.46, 0.81)</b> |
| Q5               | 124/296,958           | <b>0.70 (0.53, 0.92)</b>              | 38/59,723             | 0.88 (0.56, 1.40) | 44/84,236         | 0.81 (0.53, 1.24) | 118/272,445       | <b>0.70 (0.52, 0.93)</b> |
| P-trend          |                       | <b>0.006</b>                          |                       | 0.418             |                   | 0.222             |                   | <b>0.008</b>             |
| P-interaction    | □                     | □                                     | □                     | 0.054             | □                 | □                 | □                 | 0.95                     |
| <b>CD</b>        |                       |                                       |                       |                   |                   |                   |                   |                          |
| Q1               | 39/266,189            | Ref                                   | 19/103,990            | Ref               | 23/128,845        | Ref               | 35/241,334        | Ref                      |
| Q2               | 38/282,396            | 1.03 (0.65, 1.64)                     | 15/81,402             | 1.03 (0.51, 2.08) | 18/110,362        | 1.07 (0.56, 2.04) | 35/253,436        | 1.02 (0.63, 1.66)        |
| Q3               | 32/293,636            | 0.88 (0.53, 1.44)                     | 16/69,952             | 1.30 (0.64, 2.65) | 13/99,923         | 0.93 (0.45, 1.92) | 35/263,665        | 1.01 (0.61, 1.66)        |
| Q4               | 36/300,132            | 1.00 (0.60, 1.64)                     | 12/62,716             | 1.10 (0.49, 2.48) | 14/90,059         | 1.15 (0.54, 2.48) | 34/272,788        | 0.98 (0.58, 1.64)        |



|                   |             |                               |            |                               |            |                               |             |                               |
|-------------------|-------------|-------------------------------|------------|-------------------------------|------------|-------------------------------|-------------|-------------------------------|
| Q5                | 39/301,518  | 1.66)<br>1.08 (0.64,<br>1.82) | 10/60,575  | 2.44)<br>0.87 (0.37,<br>2.05) | 8/85,512   | 2.44)<br>0.63 (0.26,<br>1.55) | 41/276,581  | 1.65)<br>1.17 (0.69,<br>1.98) |
| P-trend           |             | 0.843                         |            | 0.89                          |            | 0.477                         |             | 0.646                         |
| P-<br>interaction | □           | □                             | □          | 0.771                         | □          | □                             | □           | 0.55                          |
| <b>UC</b>         |             |                               |            |                               |            |                               |             |                               |
| Q1                | 120/265,799 | Ref                           | 49/103,869 | Ref                           | 59/128,684 | Ref                           | 110/240,984 | Ref                           |
| Q2                | 95/282,141  | <b>0.74 (0.56,<br/>0.97)</b>  | 26/81,321  | 0.66 (0.41,<br>1.08)          | 42/110,232 | 0.83 (0.55,<br>1.26)          | 79/253,230  | <b>0.67 (0.49,<br/>0.90)</b>  |
| Q3                | 77/293,452  | <b>0.57 (0.42,<br/>0.77)</b>  | 34/69,869  | 1.00 (0.62,<br>1.59)          | 34/99,835  | 0.74 (0.47,<br>1.17)          | 77/263,486  | <b>0.61 (0.45,<br/>0.84)</b>  |
| Q4                | 80/299,926  | <b>0.57 (0.42,<br/>0.78)</b>  | 13/62,701  | <b>0.42 (0.22,<br/>0.80)</b>  | 27/90,000  | 0.64 (0.39,<br>1.06)          | 66/272,627  | <b>0.50 (0.36,<br/>0.70)</b>  |
| Q5                | 85/301,273  | <b>0.59 (0.43,<br/>0.83)</b>  | 28/60,492  | 0.89 (0.52,<br>1.54)          | 36/85,372  | 0.87 (0.54,<br>1.42)          | 77/276,393  | <b>0.57 (0.40,<br/>0.80)</b>  |
| P-trend           |             | <b>0.001</b>                  |            | 0.389                         |            | 0.342                         |             | <b>0.001</b>                  |
| P-<br>interaction | □           | □                             | □          | <b>0.038</b>                  | □          | □                             | □           | 0.61                          |

CD, Crohn's disease; CI, confidence interval; HR, hazard ratio; IBD, inflammatory bowel disease; Ref, reference group; UC, ulcerative colitis

<sup>a</sup> Based on the fully adjusted model without adjustment for corresponding items

<sup>b</sup> represent P value<0.05

**Table S6 Sensitivity analysis for associations of dietary quercetin with risk of IBD, CD, and UC <sup>a</sup>**

| Daily quercetin intake                                                     | IBD                                  | CD                | UC                       |
|----------------------------------------------------------------------------|--------------------------------------|-------------------|--------------------------|
|                                                                            | HR (95% CI)                          | HR (95% CI)       | HR (95% CI)              |
| <b>Excluding incident IBD in the first two years of follow-up</b>          |                                      |                   |                          |
| Q1                                                                         | Ref                                  | Ref               | Ref                      |
| Q2                                                                         | 0.80 (0.64, 1.00)                    | 1.04 (0.68, 1.59) | <b>0.73 (0.56, 0.95)</b> |
| Q3                                                                         | <b>0.75 (0.60, 0.95)<sup>b</sup></b> | 1.04 (0.67, 1.62) | <b>0.67 (0.51, 0.88)</b> |
| Q4                                                                         | <b>0.62 (0.48, 0.80)</b>             | 1.01 (0.63, 1.62) | <b>0.51 (0.37, 0.70)</b> |
| Q5                                                                         | <b>0.74 (0.57, 0.96)</b>             | 0.97 (0.60, 1.59) | <b>0.67 (0.50, 0.92)</b> |
| P-trend                                                                    | <b>0.006</b>                         | 0.877             | <b>0.002</b>             |
| <b>Excluding incident IBD in the first four years of follow-up</b>         |                                      |                   |                          |
| Q1                                                                         | Ref                                  | Ref               | Ref                      |
| Q2                                                                         | 0.83 (0.64, 1.07)                    | 1.22 (0.76, 1.97) | <b>0.71 (0.52, 0.96)</b> |
| Q3                                                                         | <b>0.72 (0.55, 0.95)</b>             | 0.95 (0.56, 1.61) | <b>0.65 (0.47, 0.90)</b> |
| Q4                                                                         | <b>0.64 (0.47, 0.86)</b>             | 1.03 (0.60, 1.78) | <b>0.52 (0.36, 0.75)</b> |
| Q5                                                                         | 0.75 (0.55, 1.01)                    | 1.21 (0.70, 2.08) | <b>0.61 (0.42, 0.88)</b> |
| P-trend                                                                    | <b>0.017</b>                         | 0.756             | <b>0.002</b>             |
| <b>Restrict analysis to individuals with at 2 rounds of 24h recalls</b>    |                                      |                   |                          |
| Q1                                                                         | Ref                                  | Ref               | Ref                      |
| Q2                                                                         | <b>0.73 (0.55, 0.97)</b>             | 0.93 (0.54, 1.58) | <b>0.66 (0.47, 0.93)</b> |
| Q3                                                                         | <b>0.68 (0.50, 0.91)</b>             | 0.70 (0.39, 1.27) | 0.71 (0.49, 1.04)        |
| Q4                                                                         | <b>0.69 (0.51, 0.94)</b>             | 0.93 (0.51, 1.68) | <b>0.62 (0.43, 0.89)</b> |
| Q5                                                                         | <b>0.71 (0.51, 0.98)</b>             | 0.71 (0.37, 1.36) | <b>0.67 (0.47, 0.95)</b> |
| P-trend                                                                    | 0.075                                | 0.382             | 0.126                    |
| <b>Identifying individuals with IBD using at least two medical records</b> |                                      |                   |                          |
| Q1                                                                         | Ref                                  | Ref               | Ref                      |
| Q2                                                                         | 0.82 (0.63, 1.08)                    | 0.89 (0.54, 1.45) | 0.80 (0.58, 1.11)        |
| Q3                                                                         | <b>0.63 (0.46, 0.85)</b>             | 0.68 (0.39, 1.17) | <b>0.61 (0.42, 0.89)</b> |
| Q4                                                                         | <b>0.67 (0.48, 0.91)</b>             | 0.74 (0.42, 1.31) | <b>0.64 (0.43, 0.93)</b> |
| Q5                                                                         | <b>0.65 (0.47, 0.91)</b>             | 0.66 (0.36, 1.21) | <b>0.65 (0.43, 0.97)</b> |

|                                                              |                          |                   |                          |
|--------------------------------------------------------------|--------------------------|-------------------|--------------------------|
| P-trend                                                      | <b>0.005</b>             | 0.148             | <b>0.017</b>             |
| <b>Further adjusted for Charlson comorbidity index</b>       |                          |                   |                          |
| Q1                                                           | Ref                      | Ref               | Ref                      |
| Q2                                                           | <b>0.79 (0.64, 0.97)</b> | 1.01 (0.69, 1.49) | <b>0.72 (0.57, 0.91)</b> |
| Q3                                                           | <b>0.73 (0.58, 0.90)</b> | 0.95 (0.63, 1.44) | <b>0.65 (0.51, 0.84)</b> |
| Q4                                                           | <b>0.64 (0.51, 0.81)</b> | 0.99 (0.64, 1.52) | <b>0.54 (0.41, 0.72)</b> |
| Q5                                                           | <b>0.73 (0.57, 0.92)</b> | 0.99 (0.64, 1.54) | <b>0.64 (0.49, 0.86)</b> |
| P-trend                                                      | <b>0.003</b>             | 0.930             | <b>&lt;0.001</b>         |
| <b>Further adjusted for C-reactive protein</b>               |                          |                   |                          |
| Q1                                                           | Ref                      | Ref               | Ref                      |
| Q2                                                           | <b>0.79 (0.65, 0.97)</b> | 1.02 (0.69, 1.50) | <b>0.72 (0.57, 0.92)</b> |
| Q3                                                           | <b>0.73 (0.59, 0.91)</b> | 0.98 (0.65, 1.47) | <b>0.66 (0.51, 0.85)</b> |
| Q4                                                           | <b>0.65 (0.52, 0.83)</b> | 1.01 (0.66, 1.56) | <b>0.55 (0.41, 0.72)</b> |
| Q5                                                           | <b>0.74 (0.58, 0.94)</b> | 1.01 (0.65, 1.58) | <b>0.65 (0.49, 0.86)</b> |
| P-trend                                                      | <b>0.004</b>             | 0.974             | <b>0.001</b>             |
| <b>Further adjusted for baseline medication <sup>c</sup></b> |                          |                   |                          |
| Q1                                                           | Ref                      | Ref               | Ref                      |
| Q2                                                           | <b>0.80 (0.65, 0.98)</b> | 1.03 (0.70, 1.52) | <b>0.72 (0.57, 0.92)</b> |
| Q3                                                           | <b>0.73 (0.59, 0.91)</b> | 0.98 (0.65, 1.47) | <b>0.66 (0.51, 0.85)</b> |
| Q4                                                           | <b>0.65 (0.52, 0.83)</b> | 1.02 (0.67, 1.57) | <b>0.55 (0.41, 0.72)</b> |
| Q5                                                           | <b>0.74 (0.58, 0.94)</b> | 1.03 (0.66, 1.60) | <b>0.65 (0.49, 0.86)</b> |
| P-trend                                                      | <b>0.004</b>             | 0.942             | <b>0.001</b>             |
| <b>Further adjusted for ultra-processed food</b>             |                          |                   |                          |
| Q1                                                           | Ref                      | Ref               | Ref                      |
| Q2                                                           | <b>0.81 (0.66, 0.99)</b> | 0.99 (0.68, 1.45) | <b>0.75 (0.59, 0.94)</b> |
| Q3                                                           | <b>0.75 (0.60, 0.92)</b> | 0.94 (0.63, 1.41) | <b>0.68 (0.53, 0.87)</b> |
| Q4                                                           | <b>0.67 (0.53, 0.85)</b> | 0.99 (0.65, 1.50) | <b>0.57 (0.43, 0.75)</b> |
| Q5                                                           | <b>0.78 (0.62, 0.99)</b> | 1.03 (0.67, 1.59) | <b>0.70 (0.53, 0.92)</b> |
| P-trend                                                      | <b>0.013</b>             | 0.912             | <b>0.002</b>             |
| <b>Further adjusted for n-3 polyunsaturated fatty acids</b>  |                          |                   |                          |
| Q1                                                           | Ref                      | Ref               | Ref                      |
| Q2                                                           | <b>0.80 (0.65, 0.98)</b> | 0.97 (0.66, 1.41) | <b>0.74 (0.59, 0.94)</b> |

|         |                          |                   |                          |
|---------|--------------------------|-------------------|--------------------------|
| Q3      | <b>0.74 (0.60, 0.91)</b> | 0.90 (0.61, 1.34) | <b>0.68 (0.53, 0.87)</b> |
| Q4      | <b>0.65 (0.52, 0.82)</b> | 0.92 (0.61, 1.39) | <b>0.57 (0.43, 0.74)</b> |
| Q5      | <b>0.76 (0.61, 0.95)</b> | 0.95 (0.63, 1.45) | <b>0.69 (0.53, 0.91)</b> |
| P-trend | <b>0.004</b>             | 0.772             | <b>0.001</b>             |

BMI, body mass index; CD, Crohn's disease; CI, confidence interval; HR, hazard ratio; IBD, inflammatory bowel disease; NSAIDs, nonsteroidal anti-inflammatory drugs; Ref, reference group; TDI, Townsend deprivation index; UC, ulcerative colitis

<sup>a</sup> based on the fully adjusted model age, sex, ethnic background, adjusted for physical activity, BMI, TDI, smoking status, alcoholic drinks consumption (exclude wine), intake of cereal, meat, fish, sugar-sweetened beverages, and total energy.

<sup>b</sup> represent P value<0.05

<sup>c</sup> including use of NSAIDs, proton pump inhibitors, and antibiotic

**Table S7 Mediation analysis for C-reactive protein in associations of dietary quercetin with risk of IBD and UC <sup>a</sup>**

| Outcome | Mediating proportion (%) | Direct effect (E <sup>-04</sup> ) | Indirect effect (E <sup>-04</sup> ) |
|---------|--------------------------|-----------------------------------|-------------------------------------|
|         | Coefficient (95% CI)     | Coefficient (95% CI)              | Coefficient (95% CI)                |
| IBD     | 7.15 (0.54, 11.31)       | -12.2 (-21.9, -5.25)              | -0.93 (-1.25, -0.67)                |
| UC      | 2.74 (1.00, 4.94)        | -11.9 (-20.0, -6.00)              | -0.33 (-0.53, -0.13)                |

CI, confidence interval; HR, hazard ratio

<sup>a</sup> based on the fully adjusted model age, sex, ethnic background, adjusted for physical activity, BMI, TDI, smoking status, alcoholic drinks consumption (exclude wine), intake of cereal, meat, fish, sugar-sweetened beverages, and total energy.
